# Supplementary material
Source: PubMed Central journal article supplement (PMC6276716)
Supplement: jc.2017-02198.st1.pdf [file jc.2017-02198.st1.pdf]

**Supplemental Table 1. PI and NRTI use by HIV-infected individuals (n=20)**

| <b>PI</b>        |    |
|------------------|----|
| Norvir, %        | 50 |
| Lopinavir, %     | 20 |
| Atazanavir, %    | 15 |
| Saquinavir, %    | 10 |
| Darunavir, %     | 10 |
| Fosamprenavir, % | 10 |
| <b>NRTI</b>      |    |
| Tenofovir, %     | 50 |
| Lamivudine, %    | 45 |
| Abacavir, %      | 35 |
| Emtricitabine, % | 35 |
| Zidovudine, %    | 10 |

Data reported as percentage.

Abbreviations: PI, protease inhibitor; NRTI, nucleoside/nucleotide reverse transcriptase inhibitors

**Supplemental Table 2. Baseline Demographic and Clinical Characteristics of Non-HIV and HIV-infected Individuals**

|                                                  | Non-HIV-Infected<br>(n=10) | HIV-Infected<br>(n=20) | P Value |
|--------------------------------------------------|----------------------------|------------------------|---------|
| <b>Demographics</b>                              |                            |                        |         |
| Age (years)                                      | 52±2                       | 49±2                   | 0.34    |
| Race (%)                                         |                            |                        | 0.27    |
| Caucasian                                        | 80                         | 45                     |         |
| African American                                 | 20                         | 35                     |         |
| Other                                            | 0                          | 20                     |         |
| Male Sex (%)                                     | 70                         | 65                     | 0.78    |
| <b>HIV Parameters</b>                            |                            |                        |         |
| CD4 <sup>+</sup> T cell count (cells/μL)         | N/A                        | 571±73                 | --      |
| Log HIV RNA Viral Load (copies/mL)               | N/A                        | 1.77±0.19              | --      |
| Duration HIV (years)                             | N/A                        | 18±1                   | --      |
| Duration ART use (years)                         | N/A                        | 11±1                   | --      |
| Current PI use (%)                               | N/A                        | 60                     | --      |
| Current NRTI use (%)                             | N/A                        | 90                     | --      |
| Current NNRTI use (%)                            | N/A                        | 25                     | --      |
| History of HCV infection (%)                     | 0                          | 20                     | 0.13    |
| <b>Body Composition and Metabolic Parameters</b> |                            |                        |         |
| Iliac Waist Circumference (cm)                   | 89±4                       | 94±3                   | 0.40    |
| BMI(kg/m <sup>2</sup> )                          | 25±1                       | 26±1                   | 0.50    |
| BAI (%fat)                                       | 44±3                       | 48±3                   | 0.29    |
| VAT (cm <sup>2</sup> )                           | 140 [84,184]               | 134 [56,188]           | 0.98    |
| SAT (cm <sup>2</sup> )                           | 213 [122,269]              | 209 [107,342]          | 0.91    |
| TAT (cm <sup>2</sup> )                           | 342 [245, 474]             | 385 [233, 540]         | 0.88    |
| Total Cholesterol (mg/dL)                        | 173±11                     | 181±8                  | 0.57    |
| HOMA-IR                                          | 0.59 [0.35,1.59]           | 0.98 [0.58,1.85]       | 0.21    |
| Creatinine (mg/dL)                               | 0.79±0.04                  | 0.85±0.03              | 0.27    |
| Potassium (mmol/L)                               | 4.2±0.1                    | 4.1±0.0                | 0.21    |

Data reported as mean ± standard error mean, percentage, or median [interquartile range].

Abbreviations: ART, antiretroviral therapy; N/A, not applicable; PI, protease inhibitor; NRTI, nucleoside/nucleotide reverse transcriptase inhibitors; NNRTI, non-nucleoside reverse transcriptase inhibitors; HCV, hepatitis C virus; BMI, body mass index; BAI, body adipose index; VAT, visceral adipose tissue; SAT, subcutaneous adipose tissue; TAT, total adipose tissue; HOMA-IR, homeostatic model assessment of insulin resistance

**Supplemental Table 3. Model to Assess Determinants of Serum Aldosterone among HIV-Infected Individuals During RAAS Activation**

| <b>Serum Aldosterone (ng/dL)</b> | <b><math>\beta</math> Estimate</b> | <b>P Value</b> |
|----------------------------------|------------------------------------|----------------|
|                                  | ( $R^2=0.59$ ; $P=0.007$ )         |                |
| BNP (pg/mL)                      | -0.3545                            | 0.04           |
| PRA (ng/mL/hr)                   | 0.4824                             | 0.005          |
| Urine Sodium (mmol/24hr)         | -0.0006                            | 0.79           |
| MAP (mmHg)                       | -0.0053                            | 0.56           |

$R^2$  represents the coefficient of determination and the proportion of variance explained by the model. P value represents significance by the whole model ANOVA test.

Performed under conditions of equivalent low sodium intake for both groups as described in the text.

Abbreviations: BNP, brain natriuretic peptide; PRA, plasma renin activity; MAP, mean arterial pressure
